# Supplementary material for: Altered generation of ciliated cells in chronic obstructive pulmonary disease
Source: PubMed Central journal article supplement (PMC6884487; doi:10.1038/s41598-019-54292-x), 2019-11-29

# 1 **Altered generation of ciliated cells in chronic obstructive pulmonary disease**

2 Authors: Sophie Gohy<sup>1,2</sup> MD PhD, François M. Carlier<sup>1</sup> MD, Chantal Fregimilicka<sup>3</sup>, Bruno  
3 Detry<sup>1</sup>, Marylène Lecocq<sup>1</sup>, Maha Zohra Ladjemi<sup>1</sup> PhD, Stijn Verleden<sup>4</sup> PhD, Delphine Hoton  
4 MD<sup>5</sup>, Birgit Weynand<sup>6</sup> MD, Caroline Bouzin<sup>3</sup> PhD and Charles Pilette<sup>1,2</sup> MD PhD.

## **METHODS**

### **5 Patients**

6 One hundred and forty-two patients were enrolled in this study, consisting of 61 controls (24  
7 nonsmokers and 37 smokers or ex-smokers) and 81 COPD patients, namely 24 mild (global  
8 initiative for chronic obstructive lung disease (GOLD) stage I), 23 moderate (GOLD stage II)  
9 and 7 severe COPD (GOLD stage III) undergoing lung resection surgery for a solitary tumor  
10 and recruited between 2007 and 2014 (Table 1). Lung explants from 27 very severe COPD  
11 (GOLD stage IV) patients were also included. Detailed clinical history was available and  
12 patients underwent lung function testing. Ex-smokers had stopped smoking for more than one  
13 year. Patients with other lung diseases were excluded. All patients gave signed informed  
14 consent to the study protocol, which was approved by our local ethical committee (Comité  
15 d'éthique hospitalo-facultaire des Cliniques universitaires Saint-Luc. Ref.  
16 #2007/19MARS/58).

### **17 Lung tissue sampling and processing**

18 Lung sections were processed for immunochemistry by immediate immersion in 4%  
19 formaldehyde in phosphate buffer saline (PBS) at pH 7.4. One large sample was put directly  
20 in culture medium for primary epithelial cell culture.

### **21 Primary cultures of human bronchial epithelial cells**

22 One piece of large, cartilaginous bronchus per patient away from the tumour site was dissected  
23 and submitted to pronase E 1mg/ml (Sigma) digestion in RPMI supplemented with 200U/ml

24 penicillin and 200µg/ml streptomycin overnight at 4°C in order to derive human broncho-  
25 epithelial cells (HBEC). After pronase digestion, cells were cultured in submerged conditions in  
26 retinoic acid-supplemented BEGM medium until confluence ( $\pm$  for 10 days). After pronase  
27 digestion and after 10 days of submerged culture, cell count was performed on two slides after  
28 centrifugation at 900 rpm during 5 min (Shandon Cytospin 3) of cell suspension (in PBS) to  
29 reach a total of 50,000 cells per slide. Using cytopsin, we analysed epithelial and  
30 mesenchymal markers to confirm that p63+ cells (basal cells) represent more than 90% of the  
31 total cells after culture in submerged conditions.

32 Cells were then detached and subcultured on 12-well polyester filter-type inserts (0.4-µm pore  
33 size; Corning, New York, USA) coated with 0.2 mg/ml collagen IV (Sigma-Aldrich, Saint-  
34 Louis, USA), seeded at a density of 50,000 cells/well until a confluent polarized monolayer is  
35 obtained. The culture was then carried out in air/liquid interface (ALI) for 2 weeks, to allow re-  
36 differentiation into a pseudo-stratified, mucociliary airway epithelium. ALI-HBEC were cultured  
37 in BEBM:DMEM (1:1) medium supplemented with penicillin (100U/ml), streptomycin  
38 (100µg/ml), bovine pituitary extract (52µg/ml), insulin (5µg/ml), hydrocortisone (0.5g/ml),  
39 transferrin (10µg/ml), epinephrine (0.5µg/ml), Epidermal Growth Factor (0.5ng/ml),  
40 triiodothyronine (3.25ng/ml), bovine serum albumin (BSA) (1.5mg/ml) and retinoic acid  
41 (30ng/ml) (Lonza, Basel, Switzerland).

42 For kinetics experiments, recombinant human TGF-β1 (10ng/ml, R&D Systems, Minneapolis,  
43 USA) was added in the basolateral compartment during 6 to 72 hours after 2 weeks of ALI  
44 differentiation. For blocking experiments, anti-TGF-β1 blocking antibody (10µg/ml, kindly  
45 gifted by Pr J. Van Snick, Ludwig Institute, UCL Brussels, Belgium), control mouse IgG  
46 (10µg/ml, our lab) or recombinant human TGF-β1 (10ng/ml, R&D Systems, Minneapolis,  
47 USA) were added in the basolateral compartment during the 2 weeks of ALI differentiation.  
48 At the end of the experiment, basolateral medium was collected and the apical pole of HBEC

49 was washed twice with 150µl sterile PBS. Apical washes were centrifuged for 5 minutes at  
50 10,000 G and stored at -20°C until assayed. HBEC inserts were kept for IHC (directly  
51 immersed in 4% formaldehyde in PBS at pH 7.4 and then embedded in paraffin blocks or  
52 used for whole-mount staining). No significant cytotoxicity was observed (release of lactate  
53 dehydrogenase < 10%) in the presented conditions (Table E1).

#### 54 **Immunohistochemistry**

55 Serial lung and inserts sections (5 µm thickness) were cut from paraffin blocks, spread on  
56 superfrost plus glass slides, and dried at 37°C for at least 24 hours. The slides were then  
57 processed for immunohistochemistry, each step of the procedure being followed by washing  
58 with tris buffer saline (TBS) with 0.1% Tween 20 (Sigma-Aldrich, Saint-Louis, USA) (pH  
59 7.4) except after blocking step. After deparaffinization, endogenous peroxidases were  
60 inhibited by incubation in 0.3% H<sub>2</sub>O<sub>2</sub> in water for 30 minutes. Antigen retrieval was  
61 performed in a citrate buffer during 75 minutes at 98°C. The slides were treated with 2%  
62 (wt/vol) BSA in TBS for 30 minutes and after that for 10 minutes with avidin and biotin  
63 0.001%. Sections were then incubated overnight at 4°C with primary antibody (except for  
64 MUC5AC antibody which was incubated for 1 hour at RT), followed by biotinylated antibody  
65 (30 minutes, RT) and streptavidin horseradish peroxidase conjugated (HRP) (BD Bioscience,  
66 San Jose, USA) (30 minutes, at RT) incubation. Sections were revealed with the Ultra View  
67 Universal 3, 3-diaminobenzidine detection kit (Roche, Basel, Switzerland) according to  
68 manufacturer's instructions.

69 Immunostaining was performed during the same run following this protocol using antibodies to  
70 p63 (clone 7JUL, Leica, Milton Keynes, UK, 1/30), CK13 (Sigma-Aldrich, Saint-Louis, USA,  
71 13.4µg/ml), β-tubulin IV (clone ONS.1A6, Sigma-Aldrich, Saint-Louis, USA, 1.16µg/ml),  
72 human FOXJ1 (polyclonal, Sigma-Aldrich, Saint-Louis, USA, 0.4µg/ml), human MUC5AC  
73 (clone CLH2, Leica, Milton Keynes, UK, 1µg/ml), human Involucrin (clone SY5, Thermo Fisher

74 Scientific, Kent, United Kingdom, 2 $\mu$ g/ml) or mouse IgG as appropriate negative control.  
75 Secondary antibodies were biotin-conjugated anti-mouse IgG (whole molecule) (Sigma-Aldrich,  
76 Saint-Louis, USA, 1/3000). Slides were scanned using Leica SCN400 scanner (Leica, Wetzlar,  
77 Germany) before selecting the areas. Ten well-preserved areas of epithelium of large and small  
78 airways (x400 magnification) were manually delineated for each patient for the quantification.  
79 Immunostainings were quantified in these areas using TissueIA software (Leica Biosystems,  
80 Dublin, Ireland). Color deconvolution was applied to each pixel using hematoxylin and DAB  
81 matrices of the software. On the DAB matrice, a threshold was adjusted for DAB detection  
82 according to intensity (grey values from 0 to 255) on representative stained versus not stained  
83 tissue areas. In a similar way, a threshold was also adjusted for tissue detection. These  
84 parameters were kept constant throughout the study for each immunostaining. Results were  
85 expressed as stained area (below threshold)/tissue area (below threshold) for  $\beta$ -tubulin IV and  
86 MUC5AC stainings and as percentage of positive cells (positive nuclei/total nuclei) for p63  
87 and FOXJ1 staining. Ciliated cells (FOXJ1 and  $\beta$ -tubulin IV) were quantified outside of areas  
88 of obvious remodeling (i.e. with squamous metaplasia, Figure E1). Of note, involucrin  
89 immunostaining was only positive in 4 out of the 63 COPD patients (data not shown) and the  
90 inclusion of those regions did not change the quantification data presented in Figure 1.  
91 For HBEC, 10 well-preserved areas of epithelium were taken for each patient for the  
92 quantification, using a Zeiss Axiovert 40 microscope and Axiovision software (Oberkochen,  
93 Germany). Quantification of the positive cells was manually done and data were expressed as  
94 the percentage of positive cells (positive cells or nuclei/total cells or nuclei).

### 95 **Whole-mount staining**

96 The membrane of the insert was cut and separated from its support before being washed twice  
97 with TBS with 0.1% Tween 20. Antigen retrieval was performed in citrate buffer containing  
98 0.1% of triton X100 (Sigma) at pH 6.0 using cooker pressure treatment during 5 min at 15 psi.

99 The endogenous peroxidases were blocked by incubating the samples for 1h at RT with  
100 Bloxall reagent (Vector Laboratories Inc., Burlingame, CA) followed by blocking with  
101 normal goat serum (Abcam Inc., Cambridge, MA, USA) 5% with 0.3% H<sub>2</sub>O<sub>2</sub> in TBS  
102 containing 0.1% Tween 20 during 2h at RT. The first primary antibody was anti-p63 (Dako;  
103 1/2000). The inserts were then incubated overnight at 4°C with the primary antibody before  
104 being washed four times with TBS with 0.1% Tween 20. A corresponding poly-HRP  
105 secondary antibody (Thermo Fisher Scientific) was applied during 3h at RT. The insert were  
106 washed four times with TBS containing 0.1% Tween 20. HRP was then visualized by  
107 tyramide signal amplification using an AlexaFluor 488-conjugated tyramide (Thermo Fisher  
108 Scientific). After a new citrate buffer incubation step, the same procedure was applied  
109 consecutively with two different primary antibodies (anti-  $\beta$ -tubulin IV; Abcam; 0.17  $\mu$ g/ml  
110 and anti-MUC5AC; Origene Herford; Germany; 0.2 $\mu$ g/ml) and 555 or 647 AlexaFluor-  
111 conjugated tyramide, respectively. After all, 3 sequential reactions with MUC5AC, beta-  
112 tubulin IV and p63 were performed. Finally, the nucleus nucleus was stained by incubation  
113 with Hoechst reagent (Thermo Fisher Scientific) and mounted with Dako fluorescence  
114 mounting medium (Dako, Carpinteria, CA, USA). Five optical sections for each stained  
115 inserts were acquired from the top to the bottom of the inserts by structured illumination using  
116 a Zeiss AxioImager equipped with an ApoTome.z1 module (20x Plan-Apochromat objective).  
117 From the acquired image stacks, maximum intensity projections were generated for analysis  
118 using the image analysis tool Author version 2017.2 (Visiopharm, Hørsholm, Denmark). P63,  
119 beta-tubulin IV and MUC5AC stained pixels were detected using a thresholding classification  
120 method. Results were expressed as percentage of stained area.

### 121 **Western blot for epithelial markers and TGF- $\beta$ signalling**

122 Cells were lysed with 150 $\mu$ l of Laemmli's sample buffer containing 0.7M 2-mercaptoethanol  
123 (Sigma-Aldrich, Saint-Louis, USA) then kept at -20°C until proceeded. Samples were heated

124 at 100°C for 5 minutes, loaded in a SDS-PAGE gel and run at 100V for 15 minutes, then at  
125 180V for 45 minutes. Cell proteins were transferred onto nitrocellulose membrane (Thermo  
126 Fisher, Waltham, USA) at 0.18A for 2 hours at RT. The membrane was blocked with 5%  
127 BSA (Sigma-Aldrich, Saint-Louis, USA) in TBS with 0.1% Tween 20 (Sigma-Aldrich, Saint-  
128 Louis, USA) for 1 hour at RT, washed and incubated with primary antibody overnight at 4°C.  
129 Membranes were then incubated for 1 hour at RT with secondary HRP-linked antibody. Prime  
130 chemiluminescent substrate was used to develop the immunochemical signal that was  
131 captured by a CCD-camera imager avoiding overexposure. Quantity One software was used  
132 for analysis. Each band individually selected was quantitated by densitometry and normalized  
133 for the corresponding GAPDH band intensity. Immunoreactive bands were revealed by  
134 chemiluminescence (GE Healthcare, Pittsburgh, USA) and detected by Chemidoc XRS  
135 apparatus (Bio-rad, Hercules, USA). Primary antibodies used were against human  $\beta$ -tubulin IV  
136 (clone ONS.1A6, Sigma-Aldrich, Saint-Louis, USA), human FOXJ1 (polyclonal, Sigma-  
137 Aldrich, Saint-Louis, USA), or human phospho-Smad2 (Ser465/467) / 3 (Ser 423/425) (Cell  
138 signaling, Danvers, USA), GAPDH (Sigma-Aldrich, Saint-Louis, USA). Secondary antibodies  
139 were peroxidase conjugated anti-mouse IgG (whole molecule) (Sigma-Aldrich, Saint-Louis,  
140 USA) and anti-rabbit IgG (Cell signaling, Danvers, USA).

#### 141 **RT-qPCR analysis for SPDEF, DNAI2, FOXJ1 messenger ribonucleic acid (mRNA)**

142 Bronchial epithelial cells were lysed by RLT buffer (Qiagen, Hilden, Germany) containing  
143 0.14M 2-mercaptoethanol (Sigma-Aldrich, Saint-Louis, USA) then kept at -80°C until  
144 proceeded. Total RNA was isolated from HBEC using the Rneasy® Plus Mini kit (Qiagen,  
145 Hilden, Germany). RNA (12 $\mu$ l out of 35 $\mu$ l of extracted RNA per HBEC sample) was reverse-  
146 transcribed with RevertAid H minus Reverse transcriptase kit (Thermo Fisher Scientific,  
147 Kent, United Kingdom) with 0.3  $\mu$ g of random hexamer (Thermo Fisher Scientific, Kent,  
148 United Kingdom), 20U of RNase inhibitor (Thermo Fisher Scientific, Kent, United Kingdom)

149 and 1mM of each dNTP (Thermo Fisher Scientific, Kent, United Kingdom) following the  
150 manufacturer's protocol in a thermocycler (Applied Biosystems, Carlsbad, USA). The  
151 expression levels were quantified by real-time quantitative PCR with the iCycler IQ5 PCR  
152 (Bio-Rad, Hercules, USA). The reaction mix contained 2.5 µl of complementary  
153 desoxyribonucleic acid diluted 10-fold, 400nM of each primer (SPEDF Forward: GCA GCT  
154 AAC AGA CAC AGC; SPEDF Reverse: TTC TCC AAG CCT GTC CG; DNAI2 Forward:  
155 GCG ATT CAT ACA TCT GGG AC; DNAI2 Reverse: CAG CAG GCT ATC TGT CCA T;  
156 FOXJ1 Forward: CCT GGC AGA ATT CAA TCC G; FOXJ1 Reverse : GCG TAC TGG GGG  
157 TCA AT; RNA18S Forward: CGG CTA CCA CAT CCA AGG AA; RNA18S Reverse: ATA  
158 CGC TAT TGG AGC TGG AAT ACC; glyceraldehyde-3-phosphate deshydrogenase  
159 (GAPDH) Forward: ACC AGG TGG TCT CCT CTG AC; GAPDH Reverse: TGC TGT AGC  
160 CAA ATT CGT TG; ribosomal protein S18 (RPS18) Forward: TGT GGG CCG AAG ATA  
161 TGC T; RPS18 Reverse: TGA TCA CAC GTT CCA CCT CAT) and 2x iQTM SYBR®  
162 Green Supermix (Bio-Rad, Hercules, USA) in a final volume of 20 µl. The cycling conditions  
163 were 95°C for 3 minutes followed by 40 cycles of 95°C for 15s and 60°C for 30s. To control  
164 the specificity of the amplification products, a melting curve analysis was performed. Samples  
165 were run in duplicate and the copy number was calculated from the standard curve. Data  
166 analysis was performed using Bio-Rad iQ5 software (Bio-Rad, Hercules, USA). Expression  
167 levels of target genes were normalized to the geometric mean of the values for the 3  
168 housekeeping genes.

### 169 **Statistical analysis**

170 Results were shown as scatter dot plots with medians and interquartile ranges. All tests used  
171 were non-parametric, Mann-Whitney U test (for unpaired data and the analysis of differences  
172 between 2 groups) and Friedman test (for paired data) followed by Dunns post hoc test (for  
173 multiple comparisons). Correlation coefficients were calculated using Spearman's rank

174 method. A  $p$  value less than 0.05 was considered as statistically significant. Statistical  
175 analyses were performed using IBM SPSS Statistics (version 24 for Windows, Chicago,  
176 USA) and figures were done using GraphPad Prism (version 7.00 for Windows; GraphPad  
177 Software, San Diego, USA; [www.graphpad.com](http://www.graphpad.com)).



178 **FOOTNOTES**

179 **Abbreviations:**

180 ALI, air liquid interface

181 BSA, bovine serum albumin

182 COPD, chronic pulmonary obstructive disease

183 GOLD, global initiative for chronic obstructive lung disease

184 FEV1, forced expiratory volume in one second

185 FVC, forced vital capacity

186 HBEC, human bronchial epithelial cell

187 HRP, horseradish peroxidase conjugated

188 PBS, phosphate buffered saline

189 RT, room temperature

190 TBS, tris buffer saline

191 TGF- $\beta$ , transforming growth factor- $\beta$

**Table E1. Lactate deshydrogenase release in experiments.**

| LDH release in baso-lateral medium | Non treated (COPD) | TGF- $\beta$ 1 (2wks) (COPD) | Anti-TGF- $\beta$ 1 (2 wks) (COPD) | Mouse IgG (2 wks) (COPD) |
|------------------------------------|--------------------|------------------------------|------------------------------------|--------------------------|
| Optical density (340nm) at 0'      | 1.137              | 1.145                        | 1.147                              | 1.144                    |
| Optical density (340nm) at 5'      | 1.134              | 1.144                        | 1.146                              | 1.144                    |
| % LDH release                      | <b>0.3</b>         | <b>0.1</b>                   | <b>0.1</b>                         | <b>0</b>                 |

  

| LDH release in baso-lateral medium | Non treated (Non-smoker, n=2) | Non treated (COPD, n=7)                                     |
|------------------------------------|-------------------------------|-------------------------------------------------------------|
| Optical density (340nm) at 0'      | 1.327<br>1.001                | 1.137<br>1.336<br>1.189<br>1.162<br>1.043<br>1.137<br>1.210 |
| Optical density (340nm) at 5'      | 1.324<br>1.002                | 1.134<br>1.324<br>1.179<br>1.164<br>1.051<br>1.134<br>1.205 |
| % LDH release (mean)               | <b>0.2</b>                    | <b>0.3</b>                                                  |

195 **FIGURE LEGENDS**

196 **Figure E1: A** - IHC pictures for MUC5AC (goblet cells) in large airways of 3 non-smoker, 3  
 197 smoker and 3 COPD patients. **B** - IHC pictures for  $\beta$ -tubulin IV (ciliated cells) in large  
 198 airways of 3 non-smoker, 3 smoker and 3 COPD patients. **C** - Quantification technique shown  
 199 in a COPD patient (epithelium delimitation in red, tissue area in green, staining labelling in  
 200 brown, exclusion of squamous metaplasia and goblet cells hyperplasia).

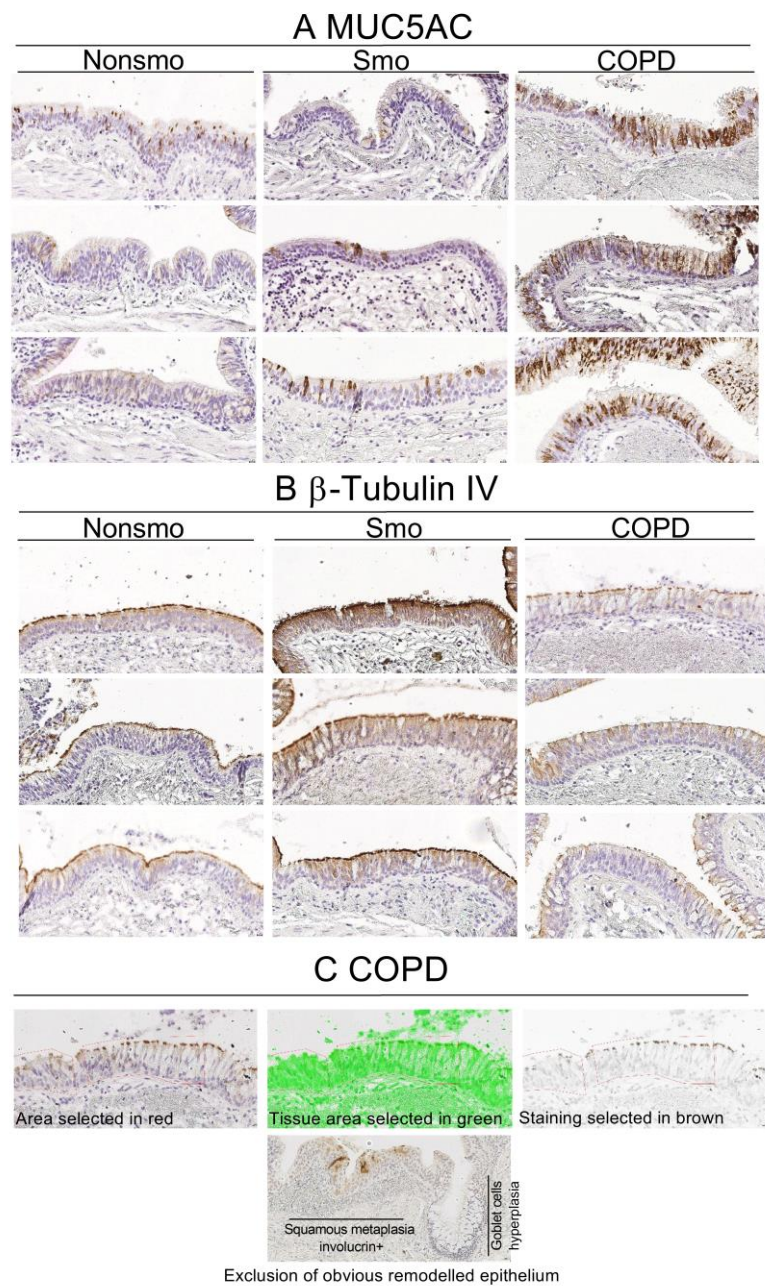

202 **Figure E2: A** - Quantification of MUC5AC staining in large airways expressed in percentage  
 203 of positive area in non-smokers, former smokers and current smokers (n=63). **B** -  
 204 Quantification of MUC5AC staining in small airways expressed in percentage of positive area  
 205 in non-smokers, former smokers and current smokers (n=54). **C** - Correlation between  
 206 MUC5AC staining in large airways and small airways (n=53). **D** - Correlation between  
 207 MUC5AC staining in small airways and DL<sub>CO</sub> in COPD patients (n=23). ). Kruskal-Wallis  
 208 test and Dunns's multiple comparisons test.

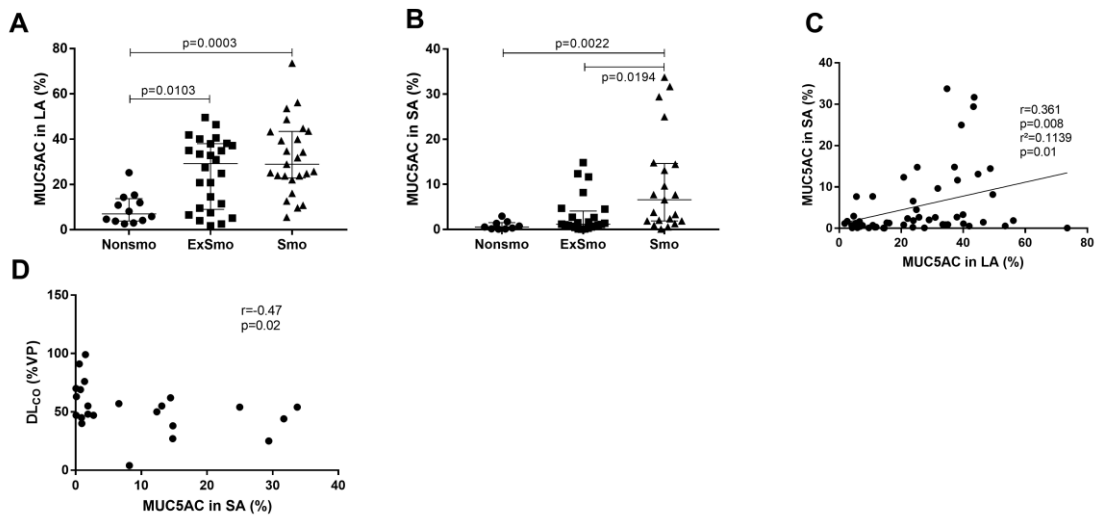

209

210

211 **Figure E3:** **A** - Correlation between MUC5AC staining in ALI-HBEC from COPD patients  
212 and FEV1 (n=19). **B** - Correlation between MUC5AC staining in ALI-HBEC from COPD  
213 patients and FEV1/FVC (n=19). **C** - Correlation between  $\beta$ -tubulin IV staining in ALI-HBEC  
214 from current and former smokers and pack-years (n=30). **D** - Correlation between MUC5AC  
215 staining in large airways and in ALI-HBEC (n=12).

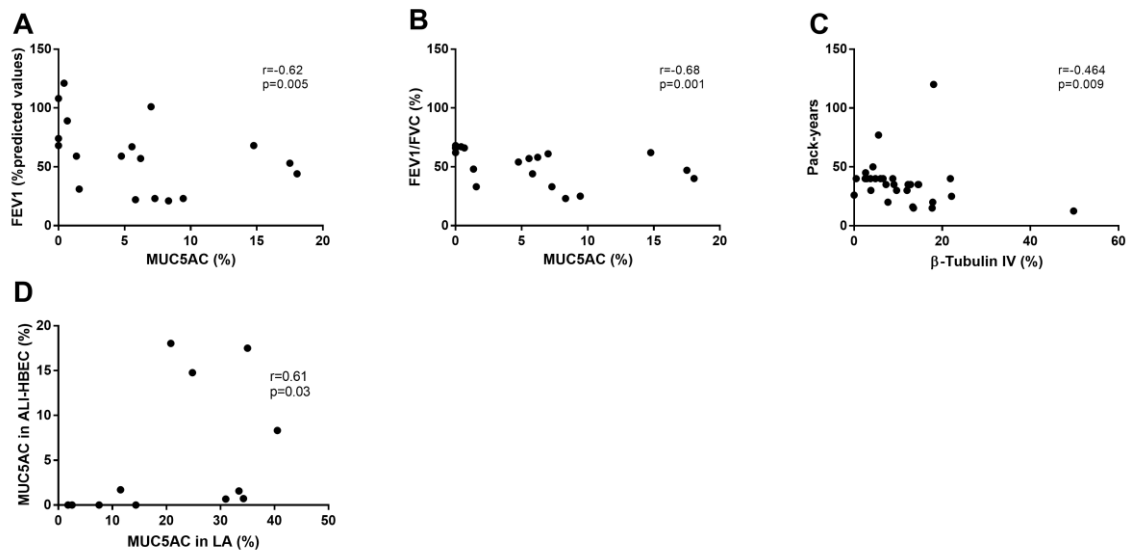

216

217

218 **Figure E4: A** - Correlation between DNAI2 mRNA/HK and pack-years in ALI-HBEC from  
219 former and current smokers (n=15).

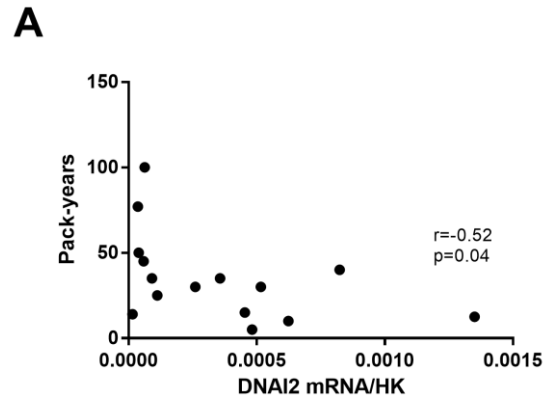

220

# **Altered generation of ciliated cells in chronic obstructive pulmonary disease**

Authors: Sophie Gohy<sup>1,2</sup> MD PhD, François M. Carlier<sup>1</sup> MD,  
Chantal Fregimilicka<sup>3</sup>, Bruno Detry<sup>1</sup>, Marylène Lecocq<sup>1</sup>,  
Maha Zohra Ladjemi<sup>1</sup> PhD, Stijn Verleden<sup>4</sup> PhD, Delphine  
Hoton MD<sup>5</sup>, Birgit Weynand<sup>6</sup> MD, Caroline Bouzin<sup>3</sup> PhD  
and Charles Pilette<sup>1,2</sup> MD PhD.

Figure 3E – WB – FOXJ1 (50kDa)

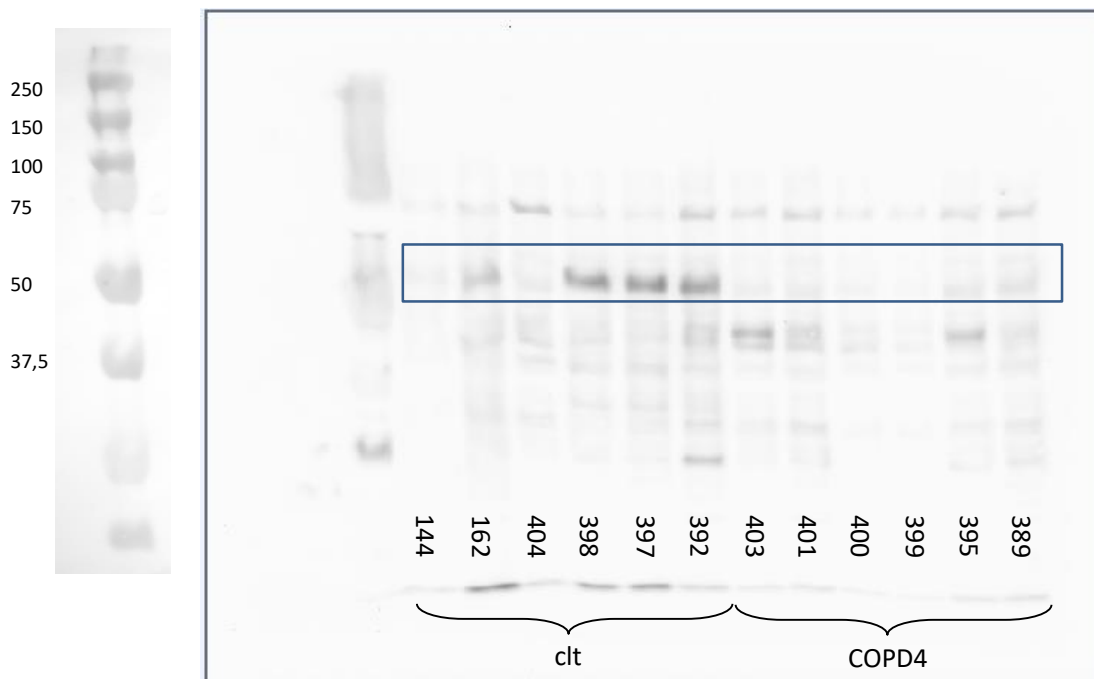

Figure 3E – WB –  $\beta$ -Tubulin IV (50kDa) and GAPDH (37kDa)

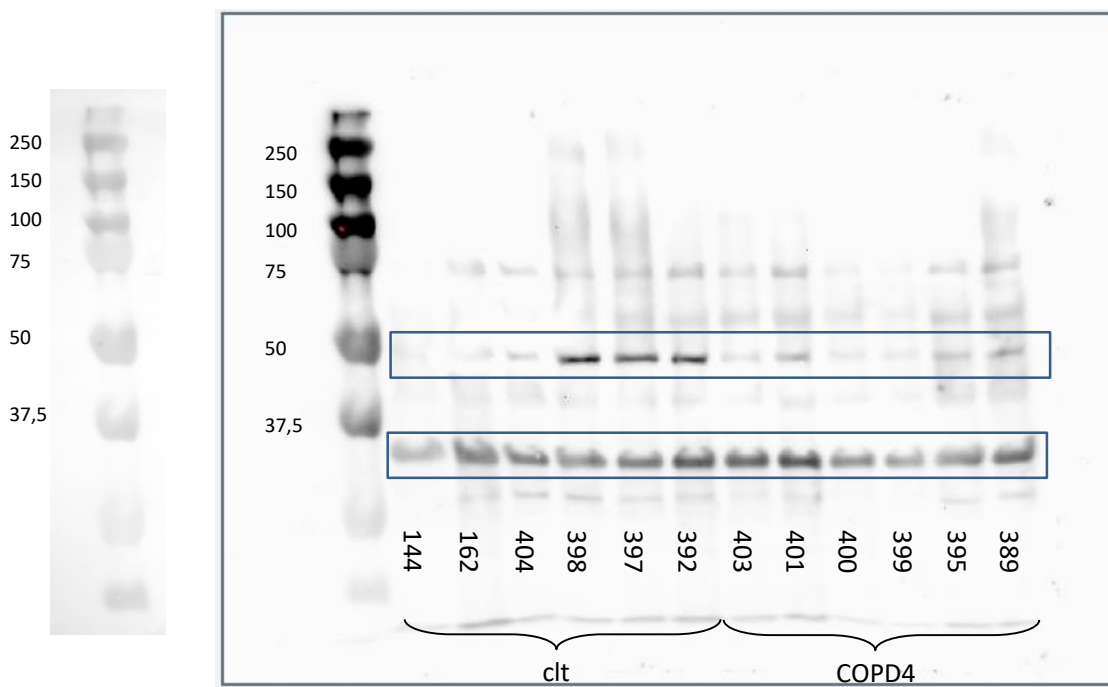



Figure 3E – WB – GAPDH (37kDa)

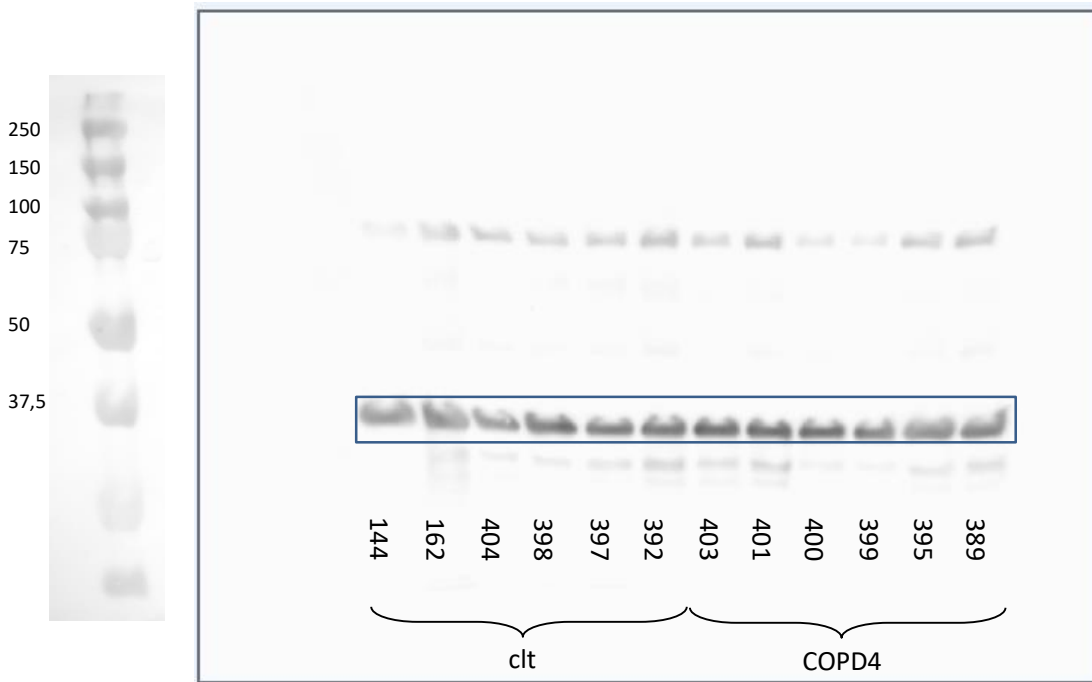

Figure 3E – WB – Molecular weight

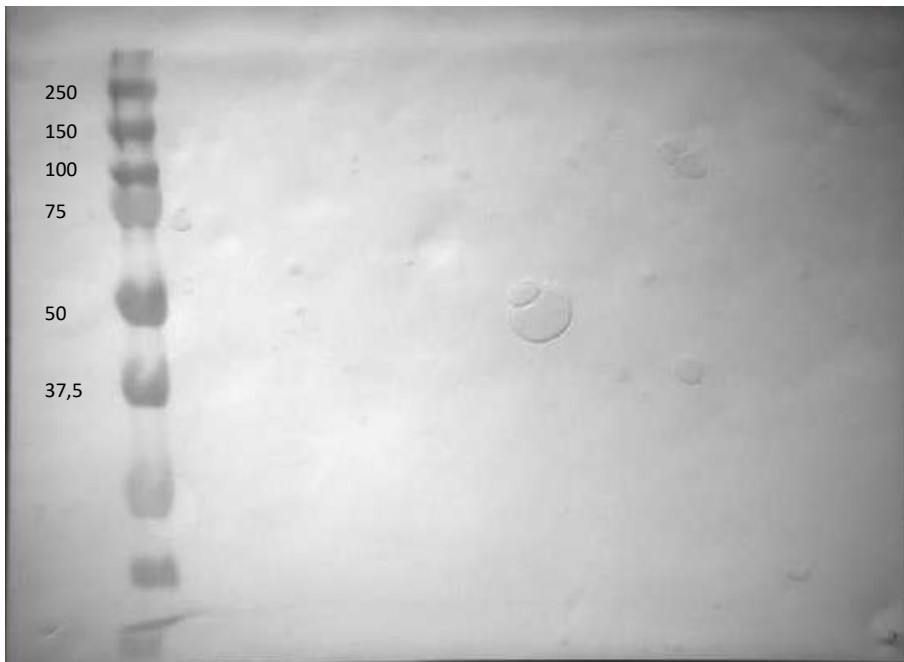

Figure 3E

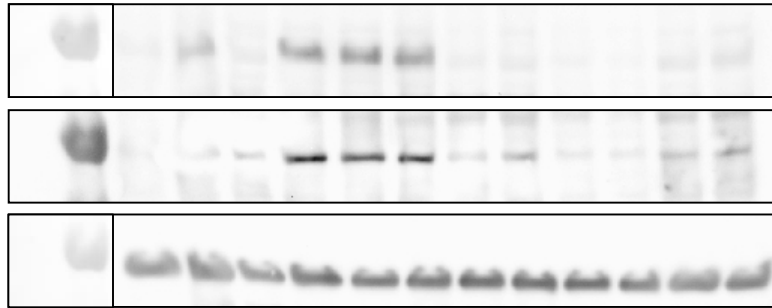

Figure 7E – WB –  $\beta$ -tubulin IV (50kDa)

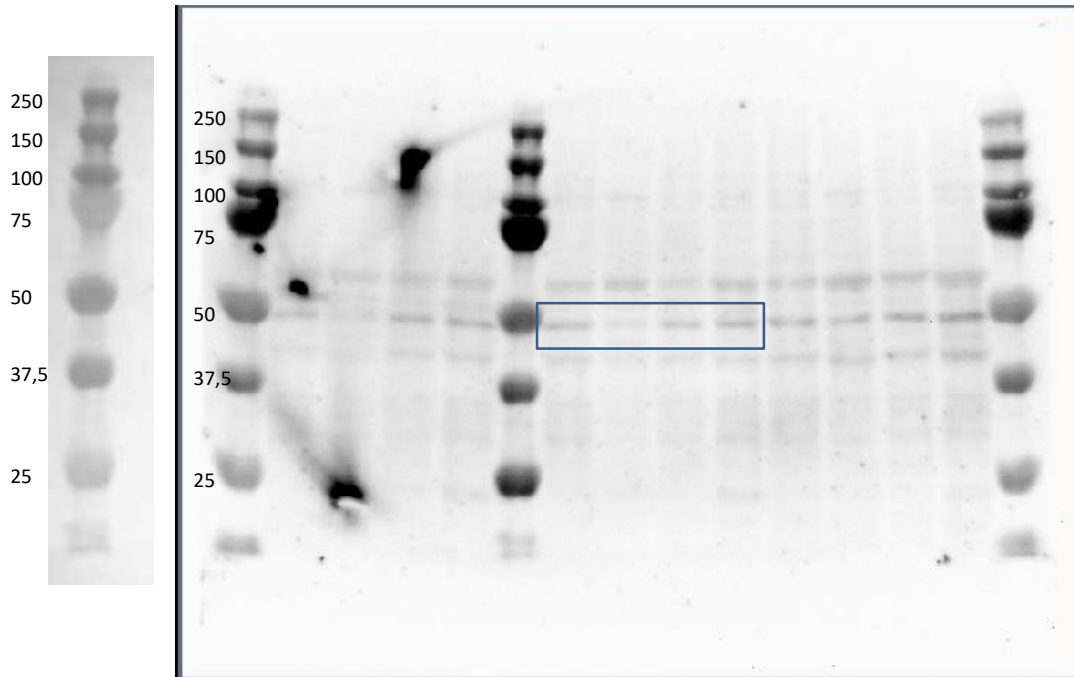

Figure 7E – WB – GAPDH (37kDa)

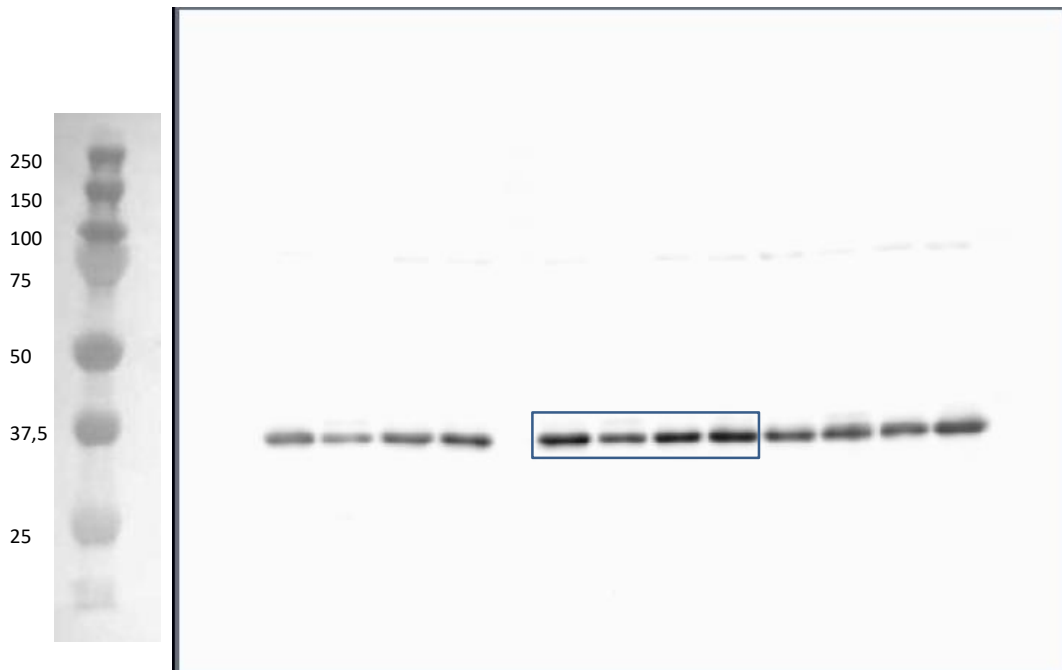

Figure 7E – WB – Molecular weight

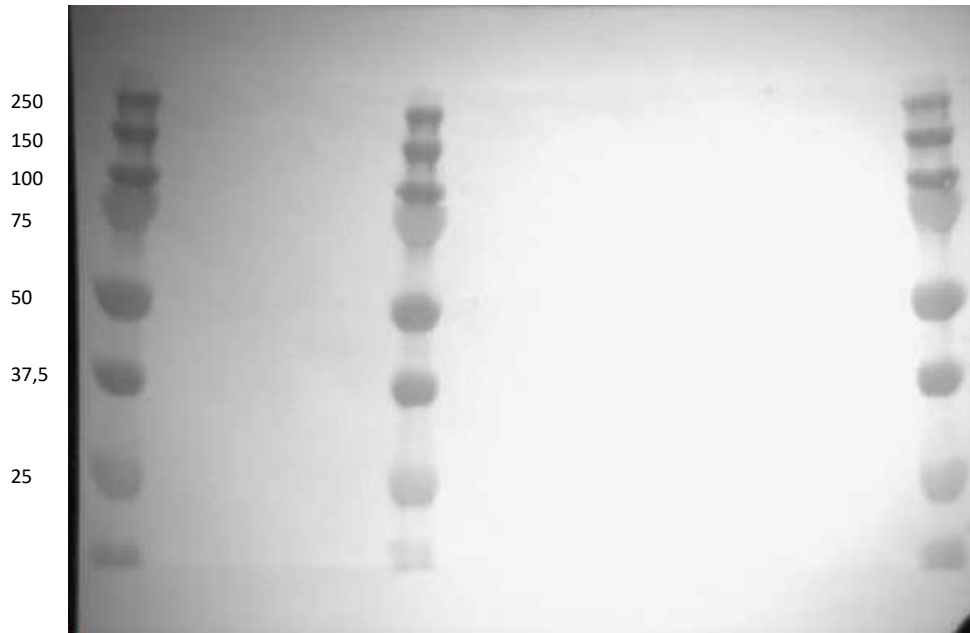

Figure 7E – WB – FOXJ1 (50kDa)

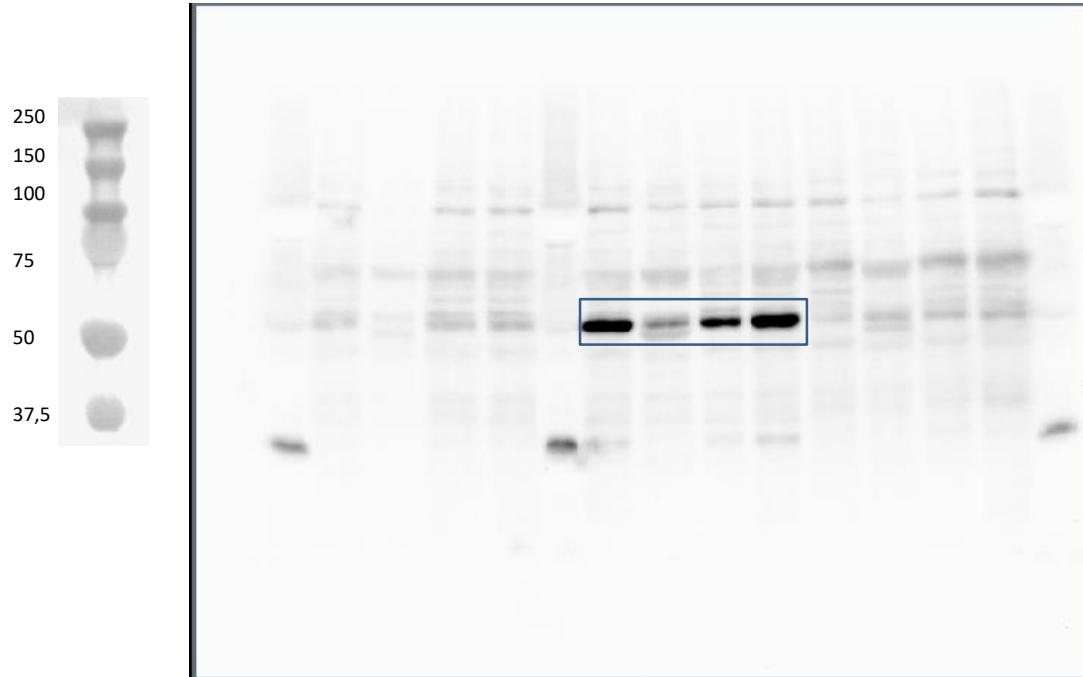

Figure 7E – WB – GAPDH (37kDa)

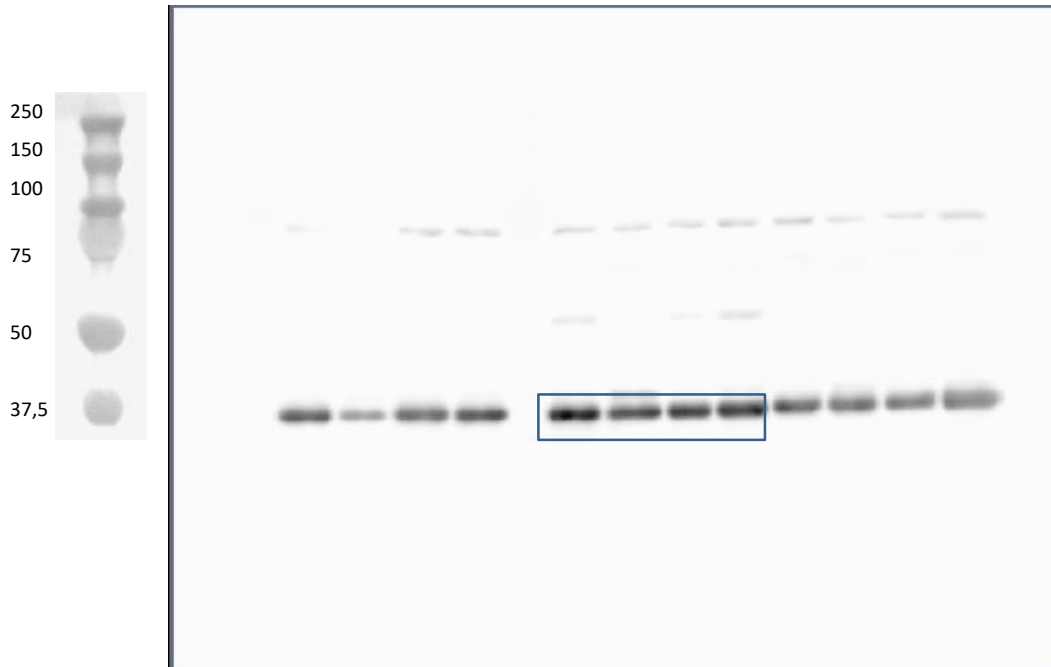

Figure 7E – WB – Molecular weight

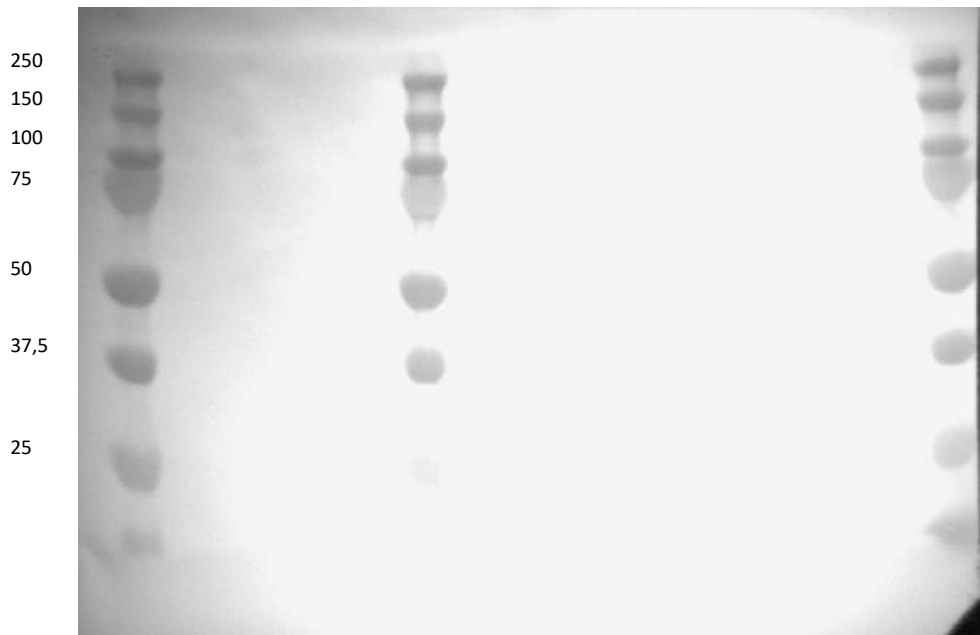

Figure 7E – WB – Psmad2/3 (68kDa)

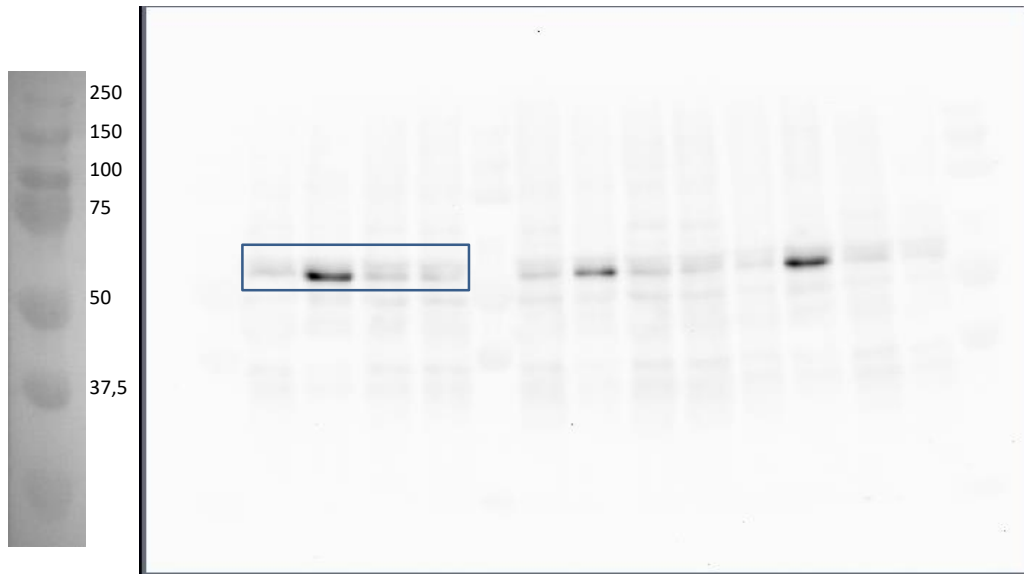

Figure 7E – WB – GAPDH (37kDa)

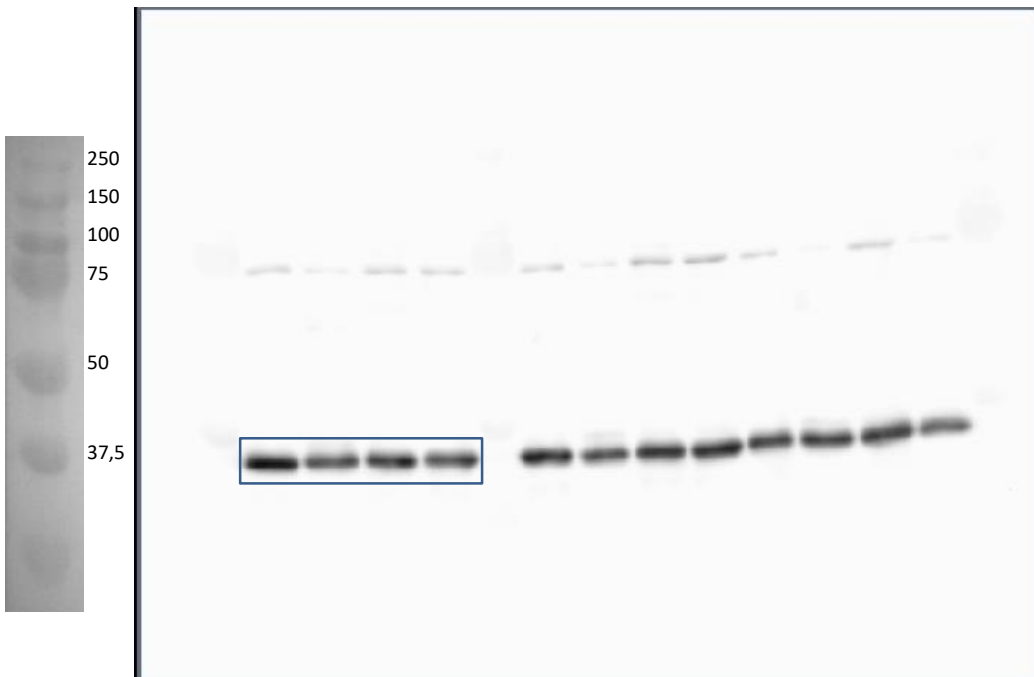

Figure 7E – WB – Molecular weight

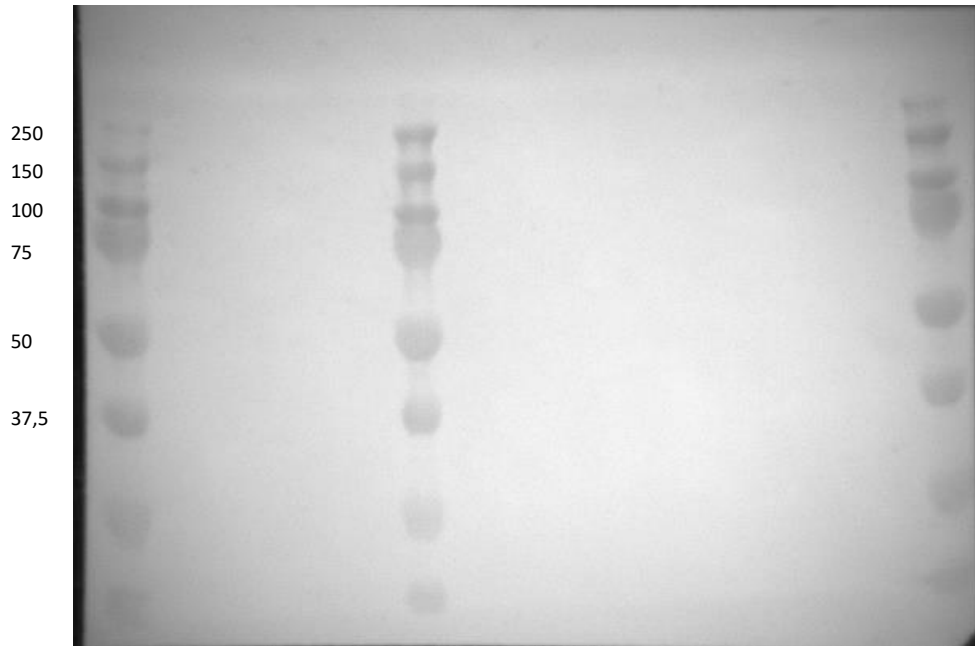

Figure 7E

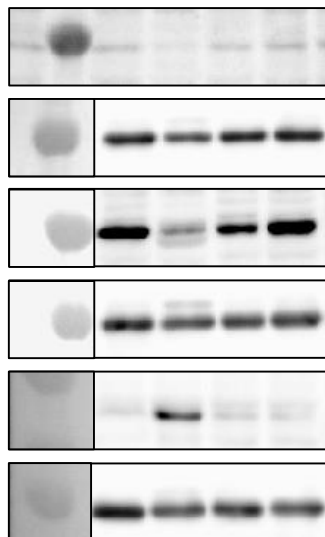

Supplement: 41598_2019_54292_MOESM1_ESM.pdf [file 41598_2019_54292_MOESM1_ESM.pdf]
